# Supplementary material for: Medical Students’ and Radiology Technician Trainees’ eHealth Literacy and Hygiene Awareness—Asynchronous and Synchronous Digital Hand Hygiene Training in a Single-Center Trial
Source: MDPI journal article supplement (doi:10.3390/healthcare11101475), 2023-05-18

Number of wetting gaps for all areas (front and back of hand) and cohorts:

| Front of hand |    |     |    | Back of hand |    |    |    |
|---------------|----|-----|----|--------------|----|----|----|
| CODE          | A  | B1  | B2 | CODE         | A  | B1 | B2 |
| RF1mid4       | 22 | 3   | 0  | LB1base1     | 7  | 24 | 8  |
| RF1base1      | 4  | 17  | 1  | LB1base2     | 5  | 14 | 0  |
| RF1base2      | 4  | 11  | 1  | LB1base4     | 9  | 23 | 0  |
| RF1base3      | 7  | 10  | 1  | LB1base3     | 6  | 14 | 0  |
| RF1base4      | 5  | 7   | 1  | LB1gap1      | 8  | 6  | 0  |
| RF1gap1       | 6  | 7   | 0  | LB1gap2      | 14 | 10 | 0  |
| RF1gap2       | 9  | 21  | 1  | LB1gap3      | 15 | 11 | 0  |
| RF1gap3       | 8  | 15  | 1  | LB1mid1      | 5  | 24 | 1  |
| RF1mid1       | 3  | 16  | 2  | LB1mid2      | 14 | 17 | 2  |
| RF1mid2       | 7  | 12  | 0  | LB1mid3      | 6  | 11 | 0  |
| RF1mid3       | 3  | 3   | 0  | LB1mid4      | 13 | 22 | 0  |
| RF1mid5       | 2  | 30  | 4  | LB1mid5      | 5  | 73 | 11 |
| RF1mid6       | 2  | 16  | 3  | LB1thumb1    | 12 | 66 | 8  |
| RF1thumb1     | 6  | 0   | 0  | LB1tips1     | 8  | 23 | 0  |
| RF1thumb2     | 1  | 13  | 5  | LB1tips2     | 9  | 12 | 1  |
| RF1thumb3     | 1  | 0   | 0  | LB1tips3     | 6  | 16 | 0  |
| RF1tips1      | 0  | 6   | 1  | LB1tips4     | 7  | 21 | 0  |
| RF1tips2      | 0  | 0   | 0  | LB1wrist1    | 15 | 72 | 2  |
| RF1tips3      | 0  | 0   | 0  | RB1base1     | 4  | 21 | 3  |
| RF1tips4      | 0  | 0   | 0  | RB1base2     | 7  | 9  | 0  |
| RF1wrist1     | 2  | 30  | 5  | RB1base4     | 7  | 24 | 3  |
| RF1wrist2     | 9  | 125 | 10 | RB1base3     | 13 | 15 | 0  |
| LF1mid4       | 17 | 6   | 0  | RB1gap1      | 12 | 6  | 0  |
| LF1base1      | 8  | 10  | 1  | RB1gap2      | 12 | 8  | 0  |
| LF1base2      | 7  | 11  | 0  | RB1gap3      | 14 | 8  | 0  |
| LF1base3      | 7  | 15  | 1  | RB1mid1      | 4  | 14 | 1  |
| LF1base4      | 9  | 12  | 1  | RB1mid2      | 8  | 18 | 1  |
| LF1gap1       | 6  | 4   | 0  | RB1mid3      | 7  | 20 | 1  |
| LF1gap2       | 6  | 15  | 1  | RB1mid4      | 4  | 25 | 1  |
| LF1gap3       | 6  | 20  | 0  | RB1mid5      | 4  | 55 | 7  |
| LF1mid1       | 3  | 3   | 1  | RB1thumb1    | 14 | 59 | 7  |
| LF1mid2       | 7  | 19  | 0  | RB1tips1     | 4  | 16 | 1  |
| LF1mid3       | 3  | 5   | 1  | RB1tips2     | 4  | 18 | 1  |
| LF1mid5       | 9  | 16  | 6  | RB1tips3     | 5  | 9  | 1  |
| LF1mid6       | 4  | 15  | 1  | RB1tips4     | 6  | 20 | 1  |
| LF1thumb1     | 6  | 1   | 0  | RB1wrist1    | 12 | 57 | 3  |
| LF1thumb2     | 3  | 19  | 6  |              |    |    |    |
| LF1thumb3     | 2  | 5   | 1  |              |    |    |    |
| LF1tips1      | 1  | 1   | 0  |              |    |    |    |
| LF1tips2      | 1  | 0   | 0  |              |    |    |    |
| LF1tips3      | 1  | 0   | 0  |              |    |    |    |
| LF1tips4      | 1  | 1   | 0  |              |    |    |    |
| LF1wrist1     | 2  | 17  | 1  |              |    |    |    |
| LF1wrist2     | 12 | 129 | 9  |              |    |    |    |

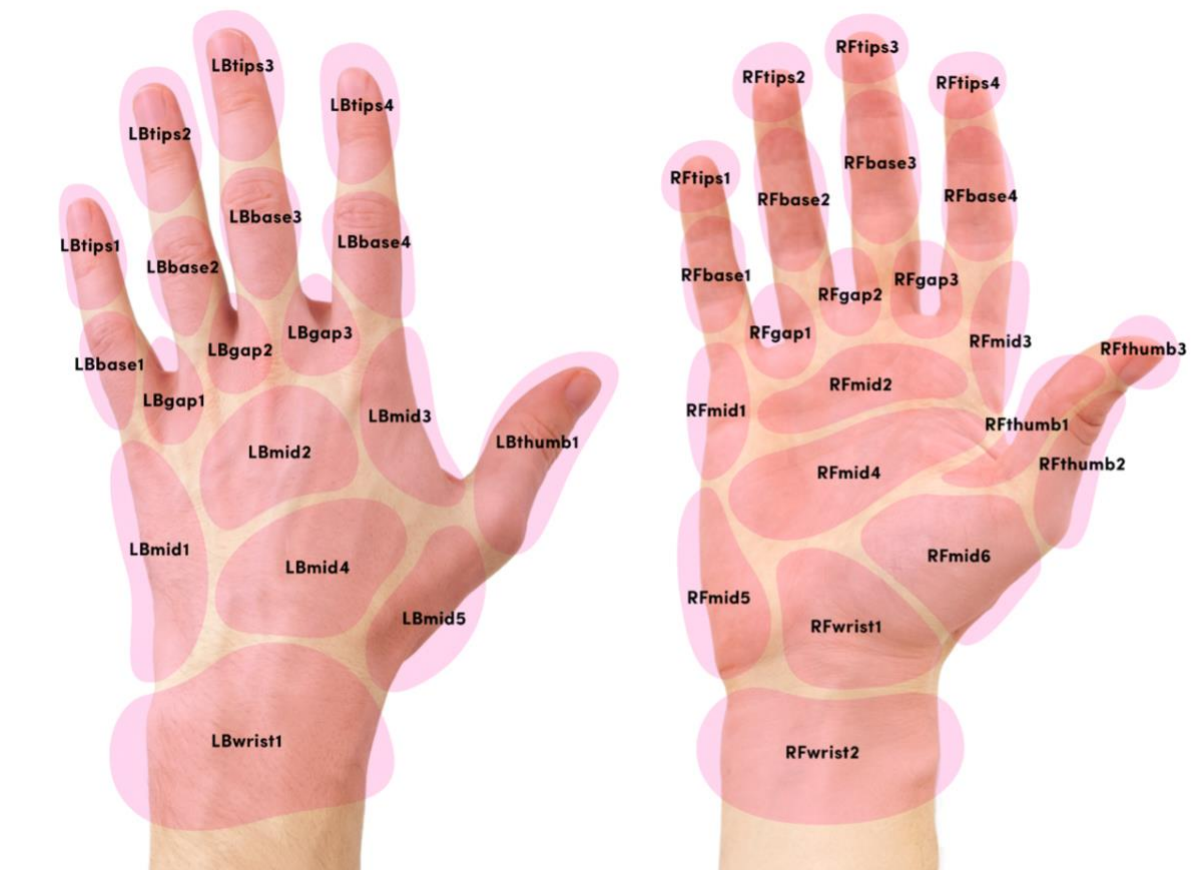

Supplement: s1 [file s1]
